# Supplementary material for: Synthesis and fluorescence properties of 2′-benzyloxy flavone—a dual probe for selective detection of picric acid and pH sensing
Source: Royal Society of Chemistry journal article supplement (doi:10.1039/d4sd00151f), 2024-01-01

## Supplementary information

### **Synthesis and fluorescent properties of 2'-benzyloxy flavone-a dual probe for selective detection of picric acid and pH sensing**

Vengatesh Gopal<sup>a</sup>, Jayashankar Sudhakaran<sup>a</sup>, Nirenjana Ramachandran<sup>a</sup>, Thejus Kozhiyottu Mana<sup>a</sup>, Aravind Ramesh Kana<sup>a</sup>, Anandhu Omanakuttan Nair<sup>a</sup>, Priyanka Mohan<sup>a</sup>, Tejaswini Madhusudhan<sup>a</sup>, Sankarasekaran Shanmugaraju<sup>c\*</sup> and Pandurangan Nanjan<sup>ab\*</sup>

<sup>a</sup> *Department of Sciences, Amrita School of Physical Sciences, Mysore, Amrita Vishwa Vidyapeetham, India.*

<sup>b</sup> *Department of Sciences, Amrita School of Physical Sciences, Coimbatore, Amrita Vishwa Vidyapeetham, India.*

<sup>c</sup> *Dhanvanthri Laboratory, Amrita School of Engineering, Coimbatore, Amrita Vishwa Vidyapeetham, India.*

Corresponding Authors

[n\\_pandurangan@cb.amrita.edu](mailto:n_pandurangan@cb.amrita.edu)

[shanmugam@iitpkd.ac.in](mailto:shanmugam@iitpkd.ac.in)

## Spectral data of synthesised compounds

**2-acetylphenyl-2-(benzyloxy) benzoate (3):** yield-85%:  $^1\text{H}$  NMR ( $\text{CDCl}_3$ )  $\delta$ : 2.46, s, 3H; 5.14, s, 2H; 6.99, m, 2H; 7.11, dd, 1H; 7.20, m, 2H; 7.28, m, 3H; 7.41, m, 2H; 7.7, dd, 1H; 8.04, dd, 1H.  $^{13}\text{C}$  NMR ( $\text{CDCl}_3$ )  $\delta$ : 197, 164, 158, 149, 136, 134, 133, 132, 131, 130, 128, 127.8, 127, 126, 124, 120, 119, 113, 70, 29. Mass data  $[\text{M}-\text{H}]^-$ ; 345.12 (Exact mass-346.12).

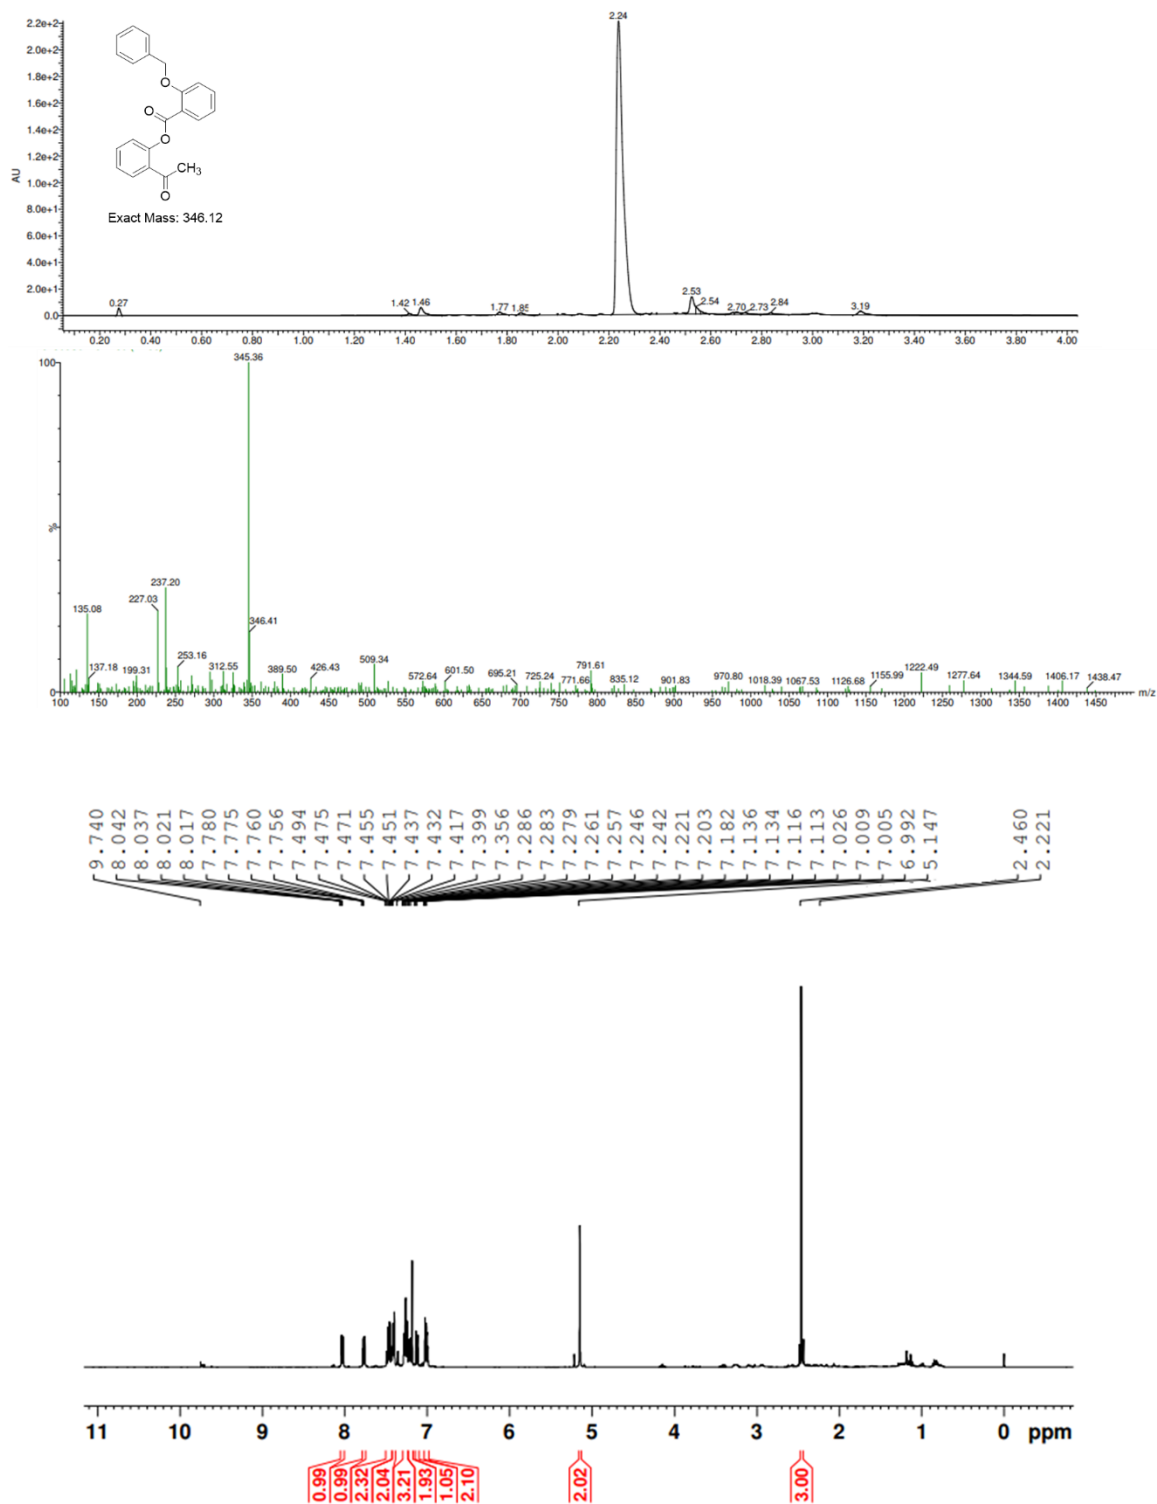

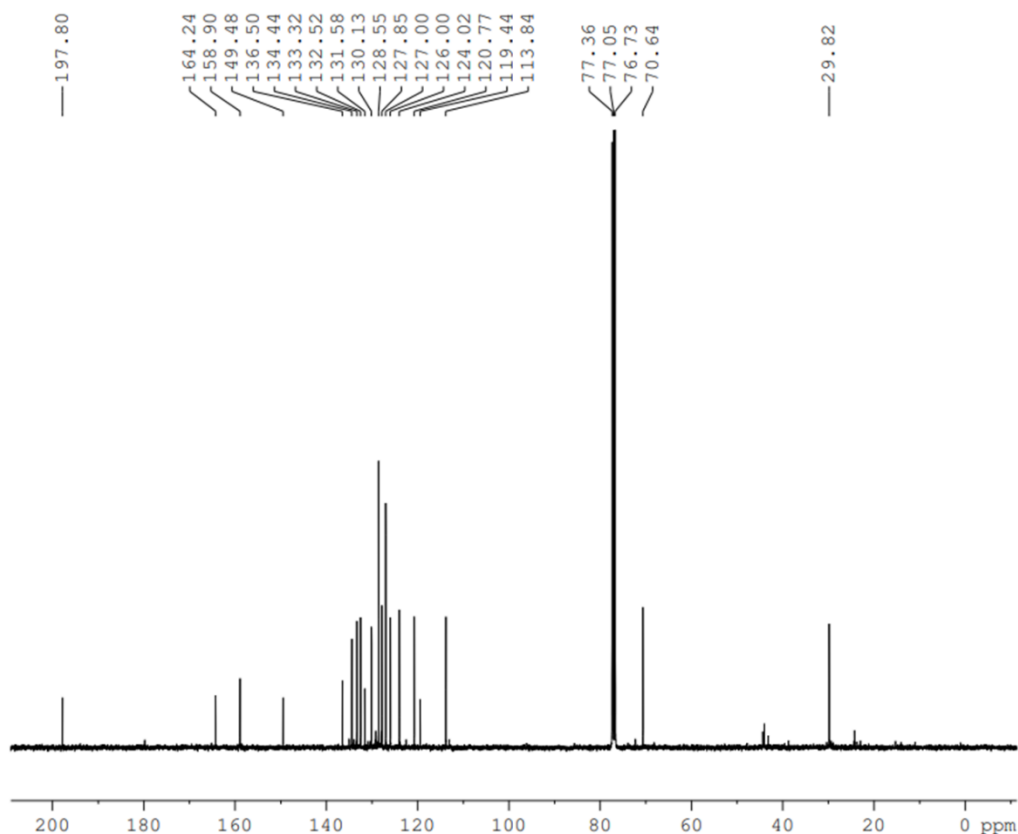

***1-(2-(benzyloxy) phenyl)-3-(2-hydroxyphenyl) propane-1,3-dione (4)***: yield-78%:  $^1\text{H}$  NMR ( $\text{CDCl}_3$ )  $\delta$ : 5.09, *s*, 2H; 6.46, *t*, 1H; 6.83, *d*, 2H ( $J = 8.4\text{Hz}$ ); 7.02, *dd*, 2H; 7.38, *m*, 2H; 7.41, *m*, 3H; 8.05, *dd*, 1H; 12.09, *s*, 1H; 15.5, *s*, 1H.  $^{13}\text{C}$  NMR ( $\text{CDCl}_3$ )  $\delta$ : 196, 174, 162, 158, 135.7, 135.2, 133, 130, 128.9, 128.7, 128.6, 121.1, 118.9, 118.3, 112, 97, 71. Mass data[M-H]<sup>-</sup>; 345.32 (Exact mass-346.12).

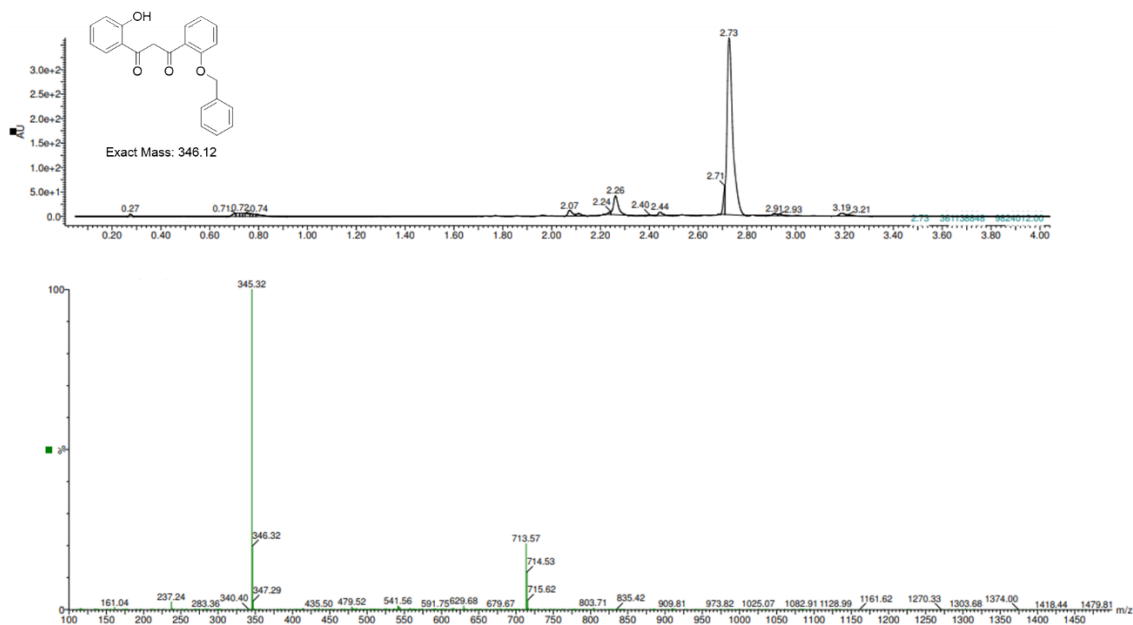

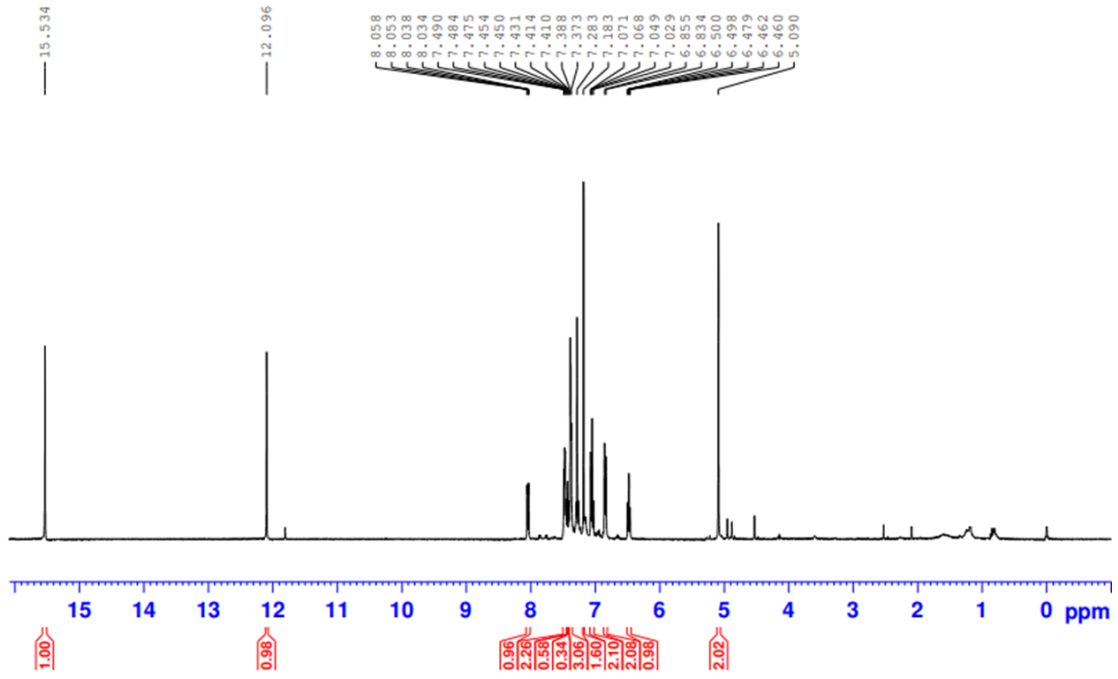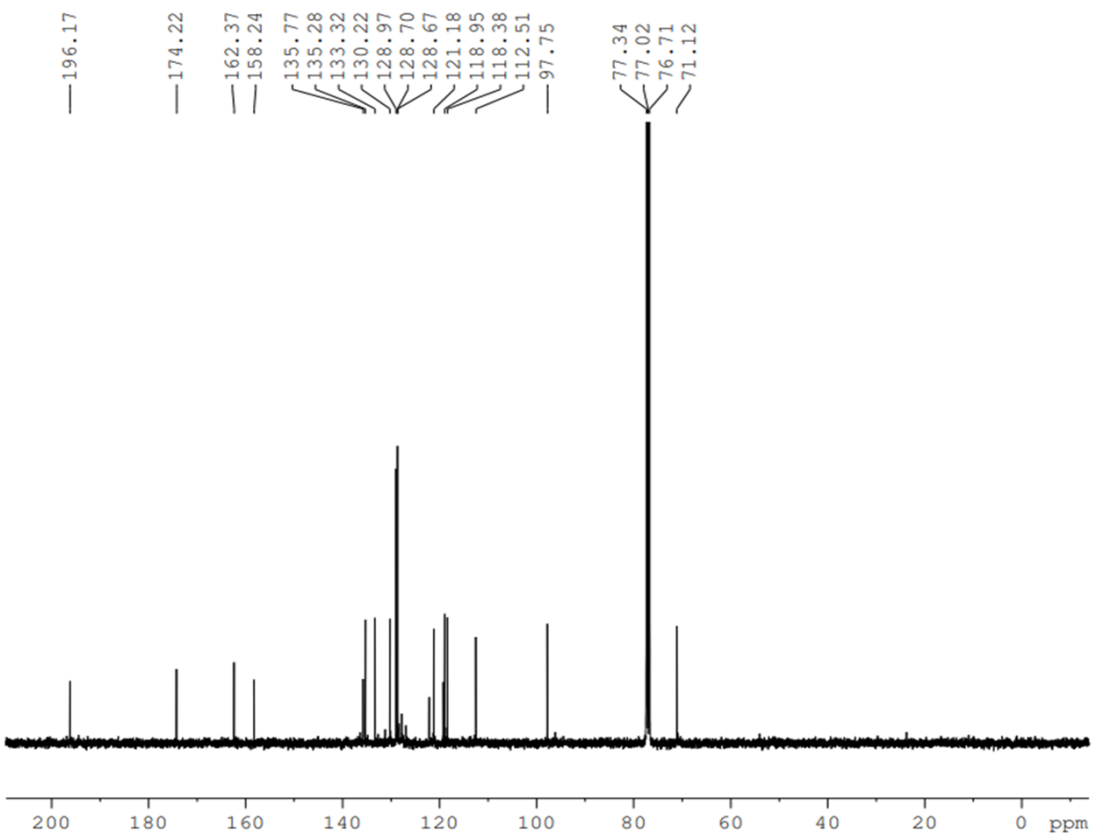

**2'-Benzoyloxy flavone (5)**: yield-72%:  $^1\text{H}$  NMR ( $\text{CDCl}_3$ )  $\delta$ : 5.18, *s*, 2H; 6.99, *m*, 2H; 7.16, *d*, 2H ( $J = 6.4$  Hz); 7.24, *d*, 1H ( $J = 6.8$  Hz); 7.3, *t*, 1H; 7.33, *m*, 4H; 7.43, *d*, 1H ( $J = 8.4$  Hz); 7.61, *t*, 1H; 7.77, *dd*, 1H; 8.16, *dd*, 1H.  $^{13}\text{C}$  NMR ( $\text{CDCl}_3$ )  $\delta$ : 178, 162, 157, 156, 136, 133, 132, 129, 128.7, 128.1, 127, 125.7, 125.1, 123, 121.4, 121.1, 118, 113, 112, 70. Mass data  $[\text{M}+\text{H}]^+$ ; 329.35 (Exact mass-328.11).

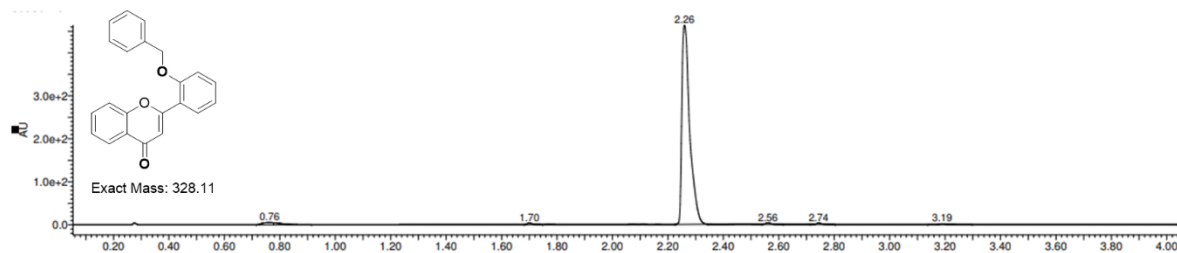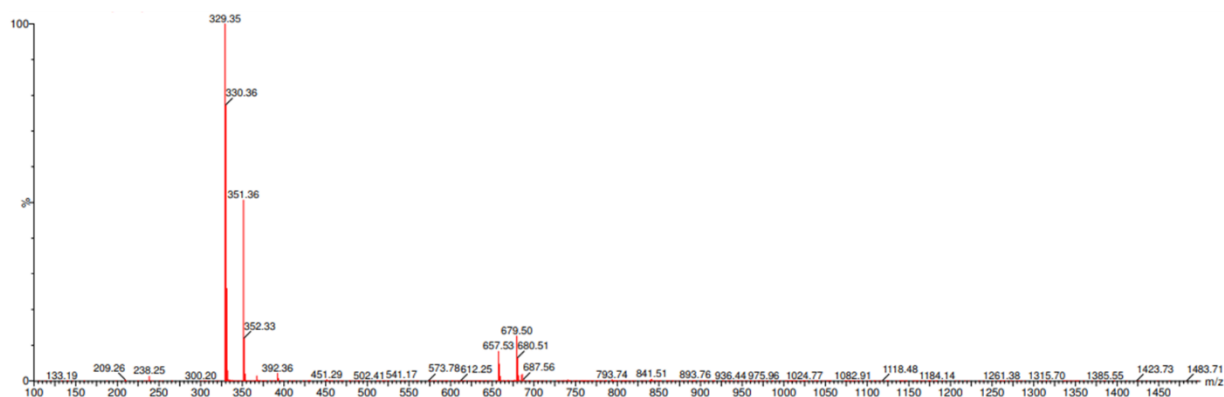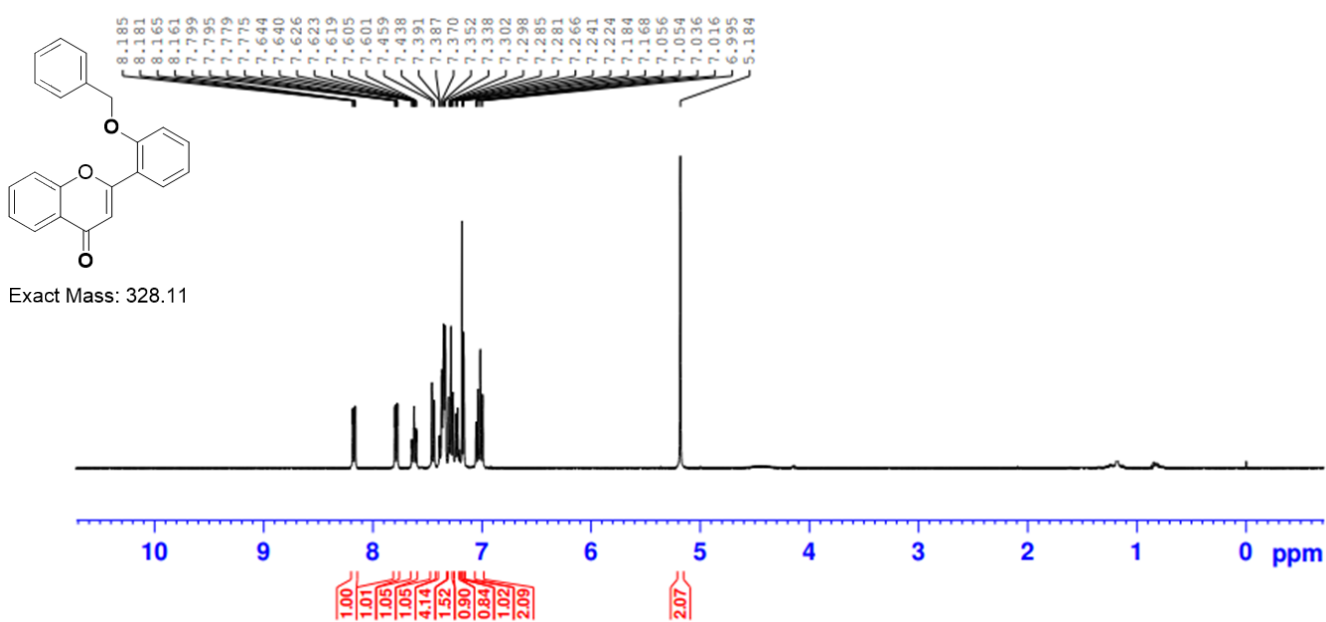

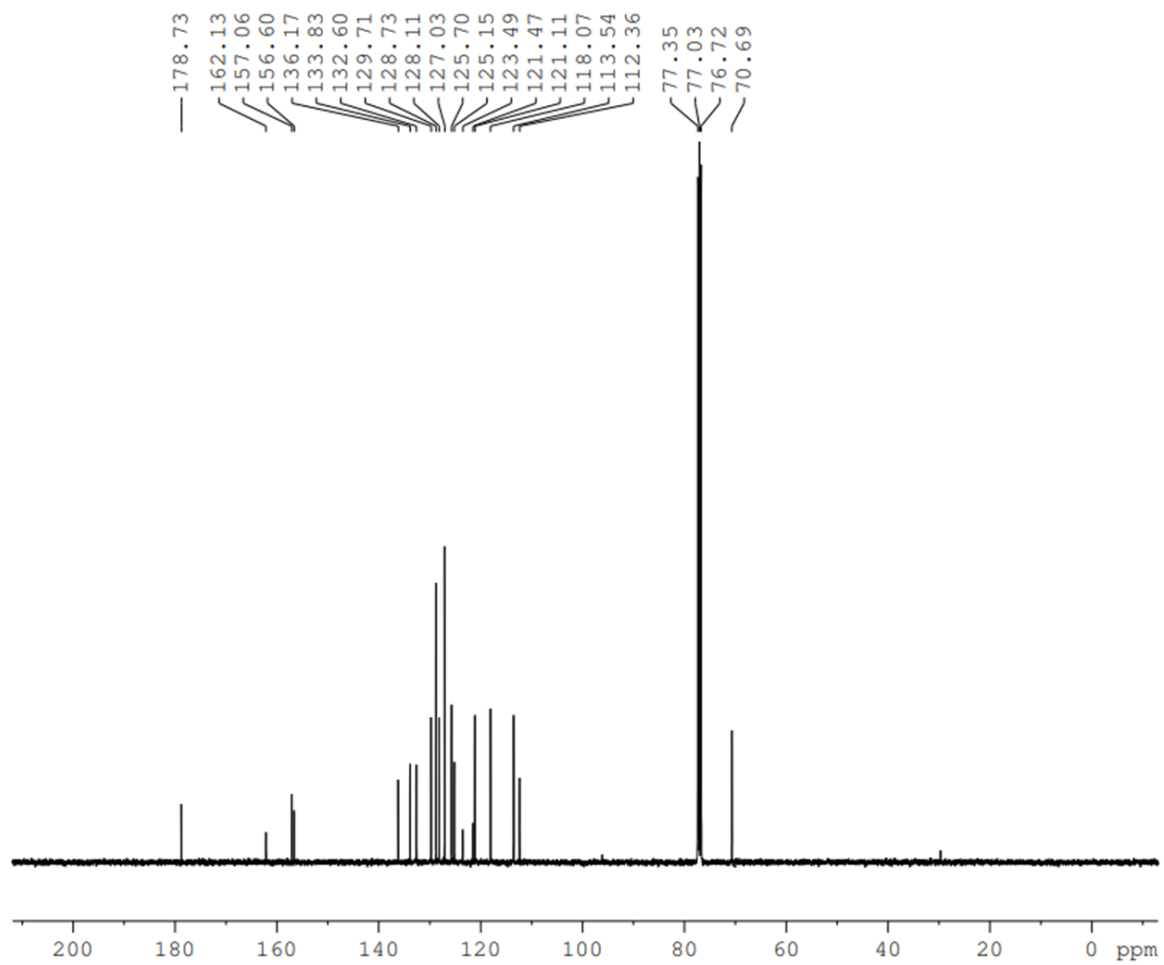

Supplement: d4sd00151f1.pdf [file d4sd00151f1.pdf]
